# Supplementary material for: Mapping near real-time soil moisture dynamics over Tasmania with transfer learning
Source: Copernicus journal article supplement (doi:10.5194/egusphere-2024-2253), 2024-08-06
Supplement: Supplementary file 1 [file egusphere-2024-2253-supplement.pdf]

## Supplementary Materials

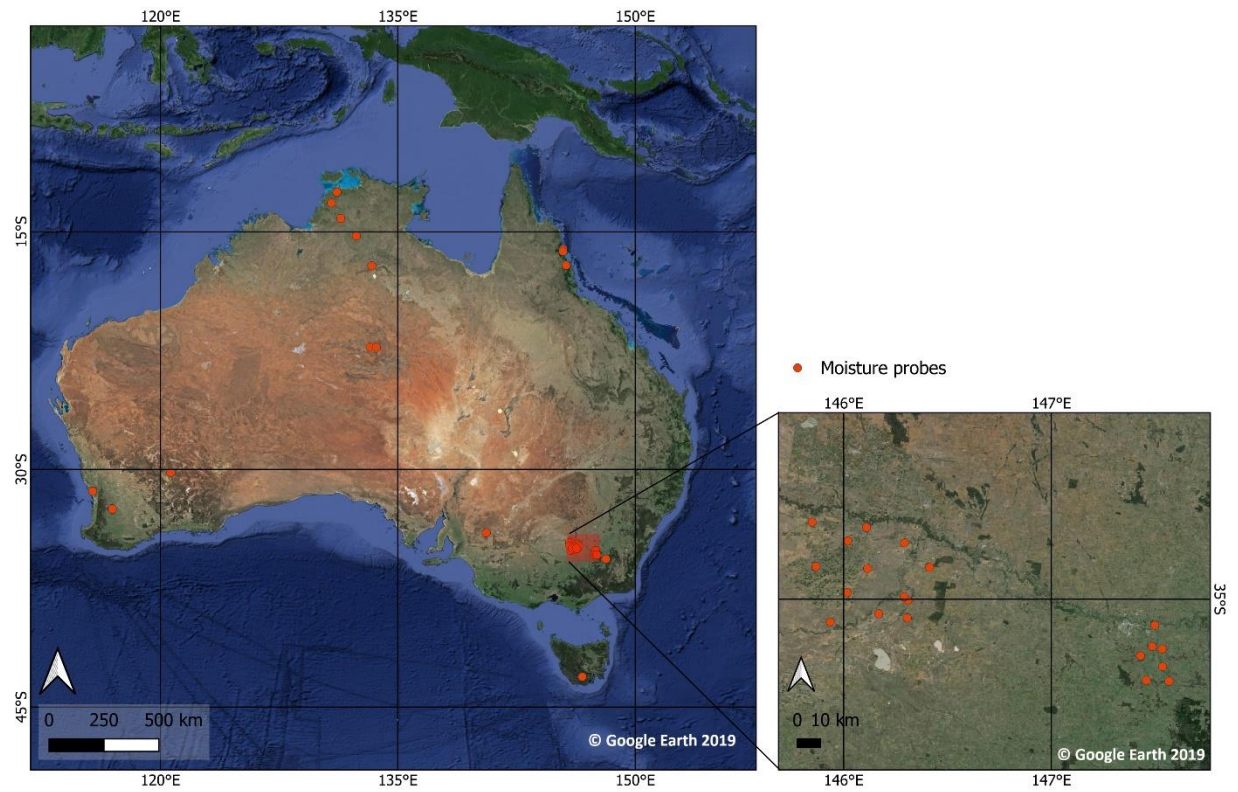

**Figure S1: Location of soil moisture monitoring stations in Australia.**
